# Supplementary material
Source: MDPI journal article supplement (https://www.mdpi.com/2075-163X/7/11/224)

# PGM production in Southern Africa, Part I: Production and Market Trends

Lisa Thormann <sup>1</sup>, Benedikt Buchspies <sup>1,\*</sup>, Charles Mbohwa <sup>2</sup> and Martin Kaltschmitt <sup>1</sup>

<sup>1</sup> Institute of Environmental Technology and Energy Economics (IUE), Hamburg University of Technology (TUHH), Eissendorfer Str. 40, 21073 Hamburg, Germany; lisa.thormann@tuhh.de (L.T.); kaltschmitt@tu-harburg.de (M.K.)

<sup>2</sup> Department of Quality and Operations Management, Faculty of Engineering and the Built Environment, University of Johannesburg, Auckland Park Kingsway Campus, P.O. Box 524, Auckland Park, 2006 Johannesburg, South Africa; cmbohwa@uj.ac.za

\* Correspondence: benedikt.buchspies@tuhh.de; Tel.: +49-40-42878-3008

## Tables:

**Table S1.** PGE prices in US\$ and ZAR per gram and per tonne [1–4].

| Currency | Metal     | 2010     | 2011     | 2012     | 2013     | 2014     | 2015     |
|----------|-----------|----------|----------|----------|----------|----------|----------|
| US\$/g   | Platinum  | 51.9415  | 55.4443  | 50.0070  | 47.8908  | 44.6217  | 33.9541  |
|          | Palladium | 17.0595  | 23.7437  | 20.8745  | 23.4566  | 26.0386  | 22.3445  |
|          | Rhodium   | 79.0610  | 65.0844  | 40.9916  | 34.3724  | 37.7524  | 30.7008  |
|          | Gold      | 39.5455  | 50.4767  | 53.6918  | 45.6541  | 40.8315  | 37.3045  |
|          | Iridium   | 20.6456  | 33.3040  | 34.2801  | 26.5710  | 17.8819  | 17.4961  |
|          | Ruthenium | 6.3803   | 5.3322   | 3.6092   | 2.4316   | 2.0940   | 1.5313   |
| US\$/t   | Nickel    | 21,804   | 22,890   | 17,533   | 15,018   | 16,865   | 11,831   |
| US\$/t   | Copper    | 7533     | 8814     | 7950     | 7326     | 6945     | 5952     |
| ZAR/g    | Platinum  | 380.2446 | 402.8994 | 410.8666 | 462.5351 | 484.2026 | 434.0603 |
|          | Palladium | 124.8865 | 172.5390 | 171.5090 | 226.5462 | 282.5518 | 285.6457 |
|          | Rhodium   | 578.7765 | 472.9514 | 336.7945 | 331.9725 | 409.6616 | 392.4705 |
|          | Gold      | 289.4977 | 366.8011 | 441.1416 | 440.9325 | 443.0736 | 476.8913 |
|          | Iridium   | 151.1390 | 242.0116 | 281.6518 | 256.6258 | 194.0418 | 223.6666 |
|          | Ruthenium | 46.7080  | 38.7477  | 29.6542  | 23.4843  | 22.7223  | 19.5763  |
| ZAR/t    | Nickel    | 159619   | 166336   | 144054   | 145046   | 183007   | 151244   |
|          | Copper    | 55148    | 64050    | 65318    | 70755    | 75357    | 76095    |

**Table S2.** Prill split and base metal content of ores [5].

| Location      | Ore      | Pt               | Pd      | Rh      | Au     | Cu             | Ni     |
|---------------|----------|------------------|---------|---------|--------|----------------|--------|
|               |          | Prill split in % |         |         |        | Ore grade in % |        |
| Western Limb  | Merensky | 63.233%          | 28.083% | 4.550%  | 4.150% | 0.092%         | 0.225% |
|               | UG2      | 56.800%          | 31.700% | 10.825% | 0.700% | 0.010%         | 0.108% |
| Eastern Limb  | Merensky | 60.000%          | 30.025% | 3.075%  | 6.875% | 0.085%         | 0.210% |
|               | UG2      | 45.350%          | 44.650% | 8.500%  | 1.525% | 0.030%         | 0.138% |
| Northern Limb | Platreef | 41.900%          | 49.400% | 3.300%  | 5.400% | 0.100%         | 0.180% |
| Zimbabwe      | MSZ      | 48.400%          | 39.900% | 4.200%  | 7.500% | 0.140%         | 0.220% |

Table S3. Mining data 2010 [6–41].

| Mine                                                | Ore milled,<br>processed<br>[1000t] | Headgrade<br>[g/t] | Pt                | Pd                | Rh               | Au   | Ru                | Ir  | TotalPGMs          | Ni       | Cu  |
|-----------------------------------------------------|-------------------------------------|--------------------|-------------------|-------------------|------------------|------|-------------------|-----|--------------------|----------|-----|
|                                                     |                                     |                    |                   |                   |                  | [kg] |                   |     |                    | [1000 t] |     |
| <b>Western Limb</b>                                 |                                     |                    |                   |                   |                  |      |                   |     |                    |          |     |
| Impala Rustenburg                                   | 13531                               | 4.60               | 24704             | 13021             | 3450             |      | 7436 <sup>c</sup> |     | 48611              | 4.9      | nd  |
| Marinkana (Lonmin) <sup>e</sup>                     | 11644                               | 4.65               | 16592             | 8291              | 2573             | 428  | 4004              | 990 | 32449              | 3.4      | 2.0 |
| Pandora <sup>e</sup>                                | 391                                 | nd                 | 639               | 320               | 31               | 18   | 173               | 33  | 1196               | 0.1      | 0.1 |
| Union                                               | 5543                                | 3.37 <sup>a</sup>  | 8618              | 3813              | 1321             | 99   | 2293 <sup>c</sup> |     | 16046              | 0.8      | 0.3 |
| Tumela                                              | 4488                                | 4.02 <sup>a</sup>  | 8590              | 3992              | 1301             | 128  | 2163 <sup>c</sup> |     | 16046              | 1.0      | 0.5 |
| Dishaba                                             | 1908                                | 4.79 <sup>a</sup>  | 4434              | 2035              | 547              | 105  | 865 <sup>c</sup>  |     | 7881               | 0.8      | 0.4 |
| Bathopele                                           | 3107                                | 3.02 <sup>a</sup>  | 4014              | 2319              | 700              | 40   | 1267 <sup>c</sup> |     | 8301               | 0.3      | 0.1 |
| Thembelani + Khuseleka                              | 3414                                | 4.09 <sup>a</sup>  | 6501              | 3320              | 831              | 176  | 1517 <sup>c</sup> |     | 12168              | 1.4      | 0.7 |
| Siphumelele + Khomani                               | 2349                                | 4.70 <sup>a</sup>  | 5593              | 2529              | 479              | 244  | 794 <sup>c</sup>  |     | 9395               | 1.4      | 0.9 |
| Western Limb TRF                                    | 5087                                | 1.18 <sup>a</sup>  | 1228              | 394               | 54               | 102  | 176 <sup>c</sup>  |     | 1851               | 0.3      | 0.2 |
| Bafokeng                                            | 2407                                | 4.31 <sup>a</sup>  | 5312              | 2181              | 381              | 295  | 658               | 127 | 8954               | 2.3      | 1.4 |
| Kroondal                                            | 2154                                | 3.80 <sup>a</sup>  | 7561              | 3753              | 1222             | 54   | 2282 <sup>c</sup> |     | 14818              | 0.4      | 0.1 |
| Zondereinde                                         | 2038                                | 5.20 <sup>a</sup>  | 6877              | 3297              | 812              | 236  | nd                | nd  | 11223 <sup>a</sup> | nd       | nd  |
| Marikana (Aquarius)                                 | 2230                                | 2.65               | 2339              | 1084              | 393              | 23   | 835 <sup>c</sup>  |     | 4652               | nd       | nd  |
| Platinum Mile RF                                    | 7000                                | 0.58               | 324               | 171               | 51               | 12   | 101 <sup>c</sup>  |     | 647                | nd       | nd  |
| Chromite TRF                                        | 293                                 | 2.28               | 110               | 40                | 30               | 0    | 82 <sup>c</sup>   |     | 263                | nd       | nd  |
| Crocodile River                                     | 1266                                | 4.10               | 1887              | 808               | 319              | 13   | 579               | 133 | 3739               | nd       | nd  |
| Eland                                               | 1329                                | 4.20 <sup>a</sup>  | 3336 <sup>d</sup> | 1689 <sup>d</sup> | 556 <sup>d</sup> | nd   | nd                | nd  | 998 <sup>d</sup>   | nd       | nd  |
| Pilanesberg                                         | 2906                                | 1.75               | 1042 <sup>b</sup> | nd                | nd               | nd   | nd                | nd  | 1703               | nd       | nd  |
| Tharisa                                             | 0                                   | 0.00               | 0                 | 0                 | 0                | 0    | 0                 | 0   | 0                  | 0.0      | 0.0 |
| Sylvania Chromite TRF                               | 907                                 | nd                 | nd                | nd                | nd               | nd   | nd                | nd  | 698                | nd       | nd  |
| <b>Northeastern Limb</b>                            |                                     |                    |                   |                   |                  |      |                   |     |                    |          |     |
| Limpopo                                             | 0                                   | 0.00               | 0                 | 0                 | 0                | 0    | 0                 | 0   | 0                  | 0.0      | 0.0 |
| Bokoni                                              | 1044                                | 4.12               | 1953              | 1309              | 196              | 112  | 346 <sup>c</sup>  |     | 3805               | 0.7      | 0.4 |
| Marula                                              | 1545                                | 4.36               | 1987              | 2058              | 417              |      | 771 <sup>c</sup>  |     | 5233               | 0.2      | nd  |
| Twickenham                                          | 25                                  | 4.20               | 102               | 91                | 17               | 3    | 31 <sup>c</sup>   |     | 241                |          |     |
| Modikwa                                             | 2288                                | 4.73               | 3824              | 3603              | 683              | 82   | 1188 <sup>c</sup> |     | 9299               | 0.5      | 0.3 |
| Smokey Hills                                        | 398                                 | 3.58               | 430               | 443               | 89               | 37   | nd                | nd  | 998 <sup>a</sup>   | nd       | nd  |
| <b>Southeastern Limb &amp; Satellite Intrusions</b> |                                     |                    |                   |                   |                  |      |                   |     |                    |          |     |
| Booyssendal (Everest)                               | 150                                 | 3.09 <sup>a</sup>  | 159               | 87                | 21               | 3    | nd                | nd  | 268 <sup>a</sup>   | nd       | nd  |
| Two rivers                                          | 2918                                | 3.95               | 3994              | 2313              | 669              |      | 1437              |     | 8414               | 0.4      | nd  |
| Mototolo                                            | 2262                                | 3.33 <sup>a</sup>  | 6265              | 3685              | 1060             | 85   | 2138 <sup>c</sup> |     | 13148              | 0.6      | 0.2 |
| Blue Ridge                                          | 1082                                | 2.36               | 997               | 492               | 157              | 16   | 361 <sup>c</sup>  |     | 2006               | nd       | nd  |
| Nkomati                                             | 3308                                | nd                 | nd                | nd                | nd               | nd   | nd                | nd  | 1490               | 9.7      | 5.2 |
| <b>Northern Limb</b>                                |                                     |                    |                   |                   |                  |      |                   |     |                    |          |     |
| Mogalakwena                                         | 10380                               | 2.60 <sup>a</sup>  | 7720              | 8029              | 468              | 822  | 485 <sup>c</sup>  |     | 16701 <sup>a</sup> | 8.5      | 5.6 |
| <b>Zimbabwe</b>                                     |                                     |                    |                   |                   |                  |      |                   |     |                    |          |     |
| Zimplats                                            | 4095                                | 3.56               | 4930              | 3975              | 439              |      | 1114 <sup>c</sup> |     | 10458              | 3.1      | nd  |
| Mimosa                                              | 2277                                | 3.86               | 2869              | 2172              | 230              |      | 692 <sup>c</sup>  |     | 5962               | 2.8      | nd  |
| Unki                                                | 0                                   | 0.00               | 0                 | 0                 | 0                | 0    | 0                 | 0   | 0                  | 0.0      | 0.0 |

Italic values present calculated values or estimations. Abbreviations: nd – no data, TRF – Tailing Retreatment Facility.

<sup>a</sup> Data represents 4E.

<sup>b</sup> Estimate based on prill split.

<sup>c</sup> Calculated by subtracting reported production quantities of single elements from total PGE production.

<sup>d</sup> According to [42], reported values present 100% Eland and 50% Mototolo. However, subtraction of Mototolo production, as reported by Angloplatinum results in negative values. Presented value presents value as reported by [42].

<sup>e</sup> Production quantities of individual elements for each mine were obtained by multiplying the share of individual metal quantities delivered in concentrate for each mine and for the whole company by the company's total production for each element.

**Note:** The ownership of mines is presented in a separate Excel sheet that is provided in the Supplementary material 2.

Table S4. Mining data 2011 [6–41].

| Mine                                     | Ore milled,<br>processed | Head<br>grade     | Pt                | Pd                | Rh               | Au              | Ru                | Ir                | TotalPGMs          | Ni       | Cu  |
|------------------------------------------|--------------------------|-------------------|-------------------|-------------------|------------------|-----------------|-------------------|-------------------|--------------------|----------|-----|
|                                          | [1000 t]                 | [g/t]             |                   |                   |                  | [kg]            |                   |                   |                    | [1000 t] |     |
| Western Limb                             |                          |                   |                   |                   |                  |                 |                   |                   |                    |          |     |
| Impala Rustenburg                        | 14054                    | 4.60              | 26708             | 14472             | 3595             |                 | 7847 <sup>c</sup> |                   | 52622              | 5.4      | nd  |
| Marinkana (Lonmin) <sup>e</sup>          | 11643                    | 4.40              | 18789             | 8859              | 2359             | 505             | 4472              | 724               | 35203              | 4.1      | 2.4 |
| Pandora <sup>e</sup>                     | 394                      | nd                | 683               | 323               | 25               | 21              | 188               | 23                | 1320               | 0.1      | 0.1 |
| Union                                    | 4786                     | 3.39 <sup>a</sup> | 7742              | 3308              | 1338             | 96              |                   | 2126 <sup>c</sup> | 14611              | 0.6      | 0.3 |
| Tumela                                   | 4192                     | 3.91 <sup>a</sup> | 8051              | 3677              | 1318             | 125             |                   | 2223 <sup>c</sup> | 15394              | 0.8      | 0.4 |
| Dishaba                                  | 1865                     | 4.78 <sup>a</sup> | 4590              | 2058              | 590              | 136             |                   | 879 <sup>c</sup>  | 8253               | 0.8      | 0.4 |
| Bathopele                                | 2440                     | 3.08 <sup>a</sup> | 3354              | 1865              | 593              | 37              |                   | 1046 <sup>c</sup> | 6895               | 0.3      | 0.1 |
| Thembelani + Khuseleka                   | 3514                     | 4.03 <sup>a</sup> | 6787              | 3427              | 910              | 207             |                   | 1466 <sup>c</sup> | 12797              | 1.4      | 0.8 |
| Siphumelele + Khomani                    | 2756                     | 4.07 <sup>a</sup> | 5758              | 2614              | 519              | 289             |                   | 561 <sup>c</sup>  | 9741               | 1.5      | 1.0 |
| Western Limb TRF                         | 4982                     | 1.23 <sup>a</sup> | 1219              | 374               | 60               | 122             |                   | 82 <sup>c</sup>   | 1857               | 0.2      | 0.2 |
| Kroondal                                 | 3782                     | 3.75 <sup>a</sup> | 12338             | 6033              | 2336             | 96              |                   | 4479 <sup>c</sup> | 25282              | 0.6      | 0.2 |
| Bafokeng                                 | 2305                     | 4.35 <sup>a</sup> | 4949              | 2019              | 367              | 273             | 635               | 122               | 8365               | 2.1      | 1.3 |
| Zondereinde                              | 1591                     | 5.60 <sup>a</sup> | 5576              | 2572              | 668              | 183             | 0                 | 0                 | 8998 <sup>a</sup>  | nd       | nd  |
| Marikana (Aquarius)                      | 1950                     | 2.34              | 1782              | 887               | 316              | 18              |                   | 656 <sup>c</sup>  | 3659               | nd       | nd  |
| Platinum Mile RF                         | 4400                     | 0.68              | 374               | 202               | 55               | 17              |                   | 128 <sup>c</sup>  | 775                | nd       | nd  |
| Chromite TRF                             | 122                      | 2.97              | 85                | 30                | 23               | 0               |                   | 58 <sup>c</sup>   | 196                | nd       | nd  |
| Crocodile River                          | 903                      | 4.00 <sup>a</sup> | 1649 <sup>b</sup> | 683 <sup>b</sup>  | 277 <sup>b</sup> | 19 <sup>b</sup> | nd                | nd                | 2629 <sup>a</sup>  | nd       | nd  |
| Eland                                    | 1531 <sup>d</sup>        | 4.42              | 2620 <sup>d</sup> | 1332 <sup>d</sup> | 427 <sup>d</sup> | nd              | nd                | nd                | nd                 | nd       | nd  |
| Pilanesberg                              | 2761                     | 1.55              | 1214 <sup>b</sup> | nd                | nd               | 0               | 0                 | 0                 | 1983               | nd       | nd  |
| Tharisa                                  | 505                      | nd                | nd                | nd                | nd               | nd              | nd                | nd                | 107.0              | nd       | nd  |
| Sylvania Chromite TRF                    | 1411                     | nd                | nd                | nd                | nd               | nd              | nd                | nd                | 1163               | nd       | nd  |
| Northeastern Limb                        |                          |                   |                   |                   |                  |                 |                   |                   |                    |          |     |
| Limpopo <sup>e</sup>                     | 0                        | 0.00              | 0                 | 0                 | 0                | 0               | 0                 | 0                 | 0                  | 0.0      | 0.0 |
| Bokoni                                   | 1046                     | nd                | nd                | nd                | nd               | nd              | nd                | nd                | 3175 <sup>a</sup>  |          |     |
| Marula                                   | 1542                     | 4.39              | 2001              | 2067              | 417              |                 | 780 <sup>c</sup>  |                   | 5265               | 0.2      | nd  |
| Twickenham                               | 198                      | 3.47 <sup>a</sup> | 26                | 20                | 9                | 0               |                   | 20 <sup>c</sup>   | 74                 | nd       | nd  |
| Modikwa                                  | 2284                     | 4.56 <sup>a</sup> | 3680              | 3331              | 709              | 99              |                   | 1021 <sup>c</sup> | 8839               | 0.5      | 0.4 |
| Smokey Hills                             | 242                      | 3.55              | 399 <sup>b</sup>  | 408 <sup>b</sup>  | 91 <sup>b</sup>  | 9 <sup>b</sup>  | 0                 | 0                 | 907 <sup>a</sup>   | nd       | nd  |
| Southeastern Limb & Satellite Intrusions |                          |                   |                   |                   |                  |                 |                   |                   |                    |          |     |
| Booyseindal (Everest)                    | 1340                     | 2.76 <sup>a</sup> | 1638              | 901               | 276              | 28              | 567 <sup>c</sup>  | 3410 <sup>a</sup> | 2.8                | nd       |     |
| Two rivers                               | 2950                     | 3.94              | 4119              | 2384              | 697              |                 | 1508 <sup>c</sup> |                   | 8709               | 0.4      | nd  |
| Mototolo                                 | 1151                     | 3.27 <sup>a</sup> | 6526              | 3787              | 1009             | 102             |                   | 1894 <sup>c</sup> | 13319              | 0.6      | 0.2 |
| Blue Ridge                               | 327                      | 2.30              | 302               | 147               | 48               | 5               |                   | 109 <sup>c</sup>  | 611                | 0.0      | 0.0 |
| Nkomati                                  | 5259                     | nd                | nd                | nd                | nd               | nd              | nd                | nd                | 1520               | 10.1     | 5.2 |
| Northern Limb                            |                          |                   |                   |                   |                  |                 |                   |                   |                    |          |     |
| Mogalakwena                              | 10835                    | 2.91              | 8868              | 9089              | 587              | 1174            | nd                | nd                | 19176 <sup>a</sup> | 10.1     | 6.6 |
| Zimbabwe                                 |                          |                   |                   |                   |                  |                 |                   |                   |                    |          |     |
| Zimplats                                 | 4223                     | 3.56              | 4930              | 3975              | 439              |                 | 1114 <sup>c</sup> |                   | 10458              | 3.1      | nd  |
| Mimosa                                   | 2311                     | 3.91              | 2974              | 2279              | 238              |                 | 737 <sup>c</sup>  |                   | 6228               | 2.9      | nd  |
| Unki                                     | 1284                     | 3.64 <sup>a</sup> | 1440              | 961               | 82               | 139             | nd                | nd                | 2254 <sup>a</sup>  | nd       | nd  |

Italic values present calculated values or estimations. Abbreviations: nd – no data, TRF – Tailing Retreatment Facility.

<sup>a</sup> Data represents 4E.

<sup>b</sup> Estimate based on prill split.

<sup>c</sup> Calculated by subtracting reported production quantities of single elements from total PGE production.

<sup>d</sup> According to [33], reported values present 100% Eland and 50% Mototolo. However, subtraction of Mototolo production, as reported by Angloplatinum results in negative values. Presented value presents value as reported by [33].

<sup>e</sup> Production quantities of individual elements for each mine were obtained by multiplying the share of individual metal quantities delivered in concentrate for each mine and for the whole company by the company's total production for each element.

Note: The ownership of mines is presented in a separate Excel sheet that is provided in the Supplementary material 2.

Table S5. Mining data 2012 [6–41].

| Mine                                                | Ore milled,<br>processed | Head<br>grade     | Pt                | Pd                | Rh               | Au               | Ru                | Ir                | Total<br>PGMs        | Ni   | Cu       |
|-----------------------------------------------------|--------------------------|-------------------|-------------------|-------------------|------------------|------------------|-------------------|-------------------|----------------------|------|----------|
|                                                     | [1000 t]                 | [g/t]             |                   |                   |                  | [kg]             |                   |                   |                      |      | [1000 t] |
| <b>Western Limb</b>                                 |                          |                   |                   |                   |                  |                  |                   |                   |                      |      |          |
| Impala Rustenburg                                   | 10654                    | 4.38              | 21265             | 11584             | 2804             |                  | 2563 <sup>c</sup> |                   | 38215                | 4.8  | nd       |
| Marinkana (Lonmin) <sup>f</sup>                     | 10367                    | 4.49              | 17478             | 8372              | 2963             | 514              | 4105              | 889               | 33808                | 3.6  | 2.1      |
| Pandora <sup>f</sup>                                | 432                      | nd                | 828               | 404               | 42               | 28               | 230               | 38                | 1543                 | 0.2  | 0.1      |
| Union                                               | 3919                     | 3.37 <sup>a</sup> | 6038              | 2685              | 1108             | 51               | 1948 <sup>c</sup> |                   | 11830                | 0.3  | 0.1      |
| Tumela                                              | 3292                     | 4.12 <sup>a</sup> | 6288              | 2929              | 1091             | 94               | 1729 <sup>c</sup> |                   | 12131                | 0.5  | 0.3      |
| Dishaba                                             | 1857                     | 4.82 <sup>a</sup> | 4207              | 1945              | 595              | 116              | 859 <sup>c</sup>  |                   | 7722                 | 0.6  | 0.4      |
| Bathopele                                           | 2518                     | 2.85 <sup>a</sup> | 3280              | 1880              | 593              | 37               | 1106 <sup>c</sup> |                   | 6895                 | 0.2  | 0.1      |
| Thembelani + Khuseleka                              | 3274                     | 4.14 <sup>a</sup> | 6234              | 3192              | 904              | 193              | 1488 <sup>c</sup> |                   | 12012                | 1.3  | 0.6      |
| Siphumelele + Khomani                               | 2439                     | 4.16 <sup>a</sup> | 5279              | 2418              | 541              | 249              | 746 <sup>c</sup>  |                   | 9233                 | 1.2  | 0.8      |
| Western Limb TRF                                    | 4883                     | 1.24 <sup>a</sup> | 1310              | 476               | 77               | 128              | 96 <sup>c</sup>   |                   | 2087                 | 0.3  | 0.2      |
| Kroondal                                            | 3744                     | 3.63 <sup>a</sup> | 12667             | 6452              | 1973             | 108              | 3555 <sup>c</sup> |                   | 24755                | 0.6  | 0.2      |
| Bafokeng                                            | 2214                     | 4.07 <sup>a</sup> | 4696 <sup>e</sup> | 1931 <sup>e</sup> | 380 <sup>e</sup> | 243 <sup>e</sup> | nd                | nd                | 7249 <sup>a, e</sup> | 1.8  | 1.1      |
| Zondereinde                                         | 1934                     | 5.10 <sup>a</sup> | 5549              | 2608              | 768              | 171              | nd                | nd                | 9096 <sup>a</sup>    | nd   | nd       |
| Marikana (Aquarius)                                 | 1820                     | 2.32              | 1757              | 804               | 308              | 15               | 798 <sup>c</sup>  |                   | 3683                 | nd   | nd       |
| Platinum Mile RF                                    | 4800                     | 0.52              | 205               | 114               | 30               | 12               | 49 <sup>c</sup>   |                   | 409                  | nd   | nd       |
| Chromite TRF                                        | 327                      | 2.90              | 88                | 28                | 23               | 0                | 9 <sup>c</sup>    |                   | 148                  | nd   | nd       |
| Crocodile River                                     | 815                      | 4.04 <sup>a</sup> | 1534              | 635               | 258              | 18               | nd                | nd                | 2444 <sup>a</sup>    | nd   | nd       |
| Eland                                               | 704                      | 4.49              | 648 <sup>d</sup>  | 364 <sup>d</sup>  | nd               | nd               | nd                | nd                | Nd                   | nd   | nd       |
| Pilanesberg                                         | 3068                     | 1.85              | 1832 <sup>b</sup> | nd                | nd               | nd               | nd                | nd                | 2994                 | nd   | nd       |
| Tharisa                                             | 1094                     | 0.00              | 137 <sup>b</sup>  | 36 <sup>b</sup>   | 18 <sup>b</sup>  | 0 <sup>b</sup>   | 27 <sup>b</sup>   | 9 <sup>b</sup>    | 227                  | 0.0  | 0.0      |
| Sylvania Chromite TRF                               | 1445                     | nd                | nd                | nd                | nd               | nd               | nd                | nd                | 1297                 | nd   | nd       |
| <b>Northeastern Limb &amp; Satellite Intrusions</b> |                          |                   |                   |                   |                  |                  |                   |                   |                      |      |          |
| Limpopo <sup>f</sup>                                | 0                        | 0.00              | 0                 | 0                 | 0                | 0                | 0                 | 0                 | 0                    | 0.0  | 0.0      |
| Bokoni                                              | 864                      | nd                | nd                | nd                | nd               | nd               | nd                | nd                | 2920 <sup>a</sup>    | nd   | nd       |
| Marula                                              | 1579                     | 4.19              | 1959              | 2018              | 420              |                  | 768 <sup>c</sup>  |                   | 5165                 | 0.2  | nd       |
| Twickenham                                          | 0                        | 0.00              | 0                 | 0                 | 0                | 0                | 0                 | 0                 | 0                    | 0.0  | 0.0      |
| Modikwa                                             | 2224                     | 4.51              | 33688             | 3410              | 590              | 102              | 904 <sup>c</sup>  |                   | 8695                 | nd   | nd       |
| Smokey Hills                                        | 331                      | 3.66              | 247 <sup>b</sup>  | 253 <sup>b</sup>  | 56 <sup>b</sup>  | 6 <sup>b</sup>   | nd                | nd                | 562 <sup>a</sup>     | nd   | nd       |
| <b>Southeastern Limb</b>                            |                          |                   |                   |                   |                  |                  |                   |                   |                      |      |          |
| Booysendal (Everest)                                | 1210                     | 2.82 <sup>a</sup> | 1214              | 632               | 206              | 17               | 429 <sup>c</sup>  | 2498 <sup>a</sup> | nd                   | nd   |          |
| Two rivers                                          | 3103                     | 3.86              | 4250              | 2537              | 723              |                  | 1565 <sup>c</sup> |                   | 9075                 | 0.6  | nd       |
| Mototolo                                            | 2466                     | 3.33 <sup>a</sup> | 7019              | 4224              | 1038             | 119              | 1922 <sup>c</sup> |                   | 14322                | 0.6  | 0.2      |
| Blue Ridge                                          | 0                        | 0.00              | 0                 | 0                 | 0                | 0                | 0                 | 0                 | 0                    | 0.0  | 0.0      |
| Nkomati                                             | 6388                     | nd                | nd                | nd                | nd               | nd               | nd                | nd                | 1191                 | 7.02 | 3.7      |
| <b>Northern Limb</b>                                |                          |                   |                   |                   |                  |                  |                   |                   |                      |      |          |
| Mogalakwena                                         | 10480                    | 2.81 <sup>a</sup> | 8641              | 9279              | 564              | 1262             | nd                | nd                | 19164 <sup>a</sup>   | 9.0  | 5.8      |
| <b>Zimbabwe</b>                                     |                          |                   |                   |                   |                  |                  |                   |                   |                      |      |          |
| Zimplats                                            | 4393                     | 3.53              | 5304              | 4224              | 479              |                  | 1230 <sup>c</sup> |                   | 11238                | 3.8  | nd       |
| Mimosa                                              | 2324                     | 3.93              | 3005              | 2333              | 241              |                  | 737 <sup>c</sup>  |                   | 6316                 | 3.9  | nd       |
| Unki                                                | 1535                     | 3.43 <sup>a</sup> | 1831              | 1262              | 147              | 207              | nd                | nd                | 3433 <sup>a</sup>    | 2.5  | 1.7      |

Italic values present calculated values or estimations. Abbreviations: nd – no data, TRF – Tailing Retreatment Facility. <sup>a</sup> Data represents 4E. <sup>b</sup> Estimate based on prill split. <sup>c</sup> Calculated by subtracting reported production quantities of single elements from total PGE production. <sup>d</sup> Values of individual mine and element were estimated by multiplying the share of the respective mine's total PGE production of the company's total PGE production by the company's production of the respective individual element. <sup>e</sup> 4E production quantities were estimated based two quarterly reports that reported production values. Therefore, sum of single elements and total 4E production might differ. <sup>f</sup> Production quantities of individual elements for each mine were obtained by multiplying the share of individual metal quantities delivered in concentrate for each mine and for the whole company by the company's total production for each element.

Note: The ownership of mines is presented in a separate Excel sheet that is provided in the Supplementary material 2.

Table S6. Mining data 2013 [6–41].

| Mine                                                | Ore milled,<br>processed | Head<br>grade     | Pt                | Pd                | Rh               | Au               | Ru                | Ir              | Total<br>PGMs       | Ni   | Cu       |
|-----------------------------------------------------|--------------------------|-------------------|-------------------|-------------------|------------------|------------------|-------------------|-----------------|---------------------|------|----------|
|                                                     | [1000 t]                 | [g/t]             |                   |                   |                  | [kg]             |                   |                 |                     |      | [1000 t] |
| <b>Western Limb</b>                                 |                          |                   |                   |                   |                  |                  |                   |                 |                     |      |          |
| Impala Rustenburg                                   | 10897                    | 4.32              | 20105             | 9936              | 2872             |                  | 9265 <sup>c</sup> |                 | 42178               | 4.0  | nd       |
| Marinkana (Lonmin) <sup>f</sup>                     | 11248                    | 4.54              | 18862             | 8532              | 2202             | 500              | 4518              | 743             | 34856               | 3.3  | 2.0      |
| Pandora <sup>f</sup>                                | 574                      | nd                | 1098              | 506               | 39               | 34               | 306               | 40              | 1990                | 0.2  | 0.1      |
| Union                                               | 3786                     | 3.34 <sup>a</sup> | 4842              | 2081              | 833              | 37               | 1386 <sup>c</sup> |                 | 9180                | 0.3  | 0.1      |
| Tumela                                              | 3063                     | 4.45 <sup>a</sup> | 6172              | 2767              | 975              | 71               | 1630 <sup>c</sup> |                 | 11615               | 0.8  | 0.3      |
| Dishaba                                             | 1698                     | 4.80 <sup>a</sup> | 4131              | 1752              | 473              | 108              | 683 <sup>c</sup>  |                 | 7147                | 0.7  | 0.3      |
| Bathopele                                           | 2509                     | 2.81 <sup>a</sup> | 3144              | 1721              | 530              | 34               | 950 <sup>c</sup>  |                 | 6379                | 0.3  | 0.1      |
| Thembelani + Khuseleka                              | 3711                     | 3.95 <sup>a</sup> | 6710              | 3198              | 816              | 204              | 1301 <sup>c</sup> |                 | 12230               | 1.6  | 0.6      |
| Siphumelele + Khomani                               | 1950                     | 4.46 <sup>a</sup> | 4346              | 1846              | 369              | 196              | 417 <sup>c</sup>  |                 | 7172                | 1.4  | 1.0      |
| Western Limb TRF                                    | 5321                     | 1.41 <sup>a</sup> | 1692              | 604               | 99               | 150              | 156 <sup>c</sup>  |                 | 2702                | 0.3  | 0.2      |
| Kroondal                                            | 4624                     | 3.55 <sup>a</sup> | 14753             | 7274              | 2449             | 125              | 4354 <sup>c</sup> |                 | 28956               | 0.4  | 0.2      |
| Bafokeng                                            | 2010                     | 4.38 <sup>a</sup> | 4474 <sup>e</sup> | 1847 <sup>e</sup> | 390 <sup>e</sup> | 211 <sup>e</sup> | nd                | nd              | 6922 <sup>a,e</sup> | 1.6  | 1.0      |
| Zondereinde                                         | 2116                     | 4.90 <sup>a</sup> | 6021              | 2855              | 717              | 163              | nd                | nd              | 9756 <sup>a</sup>   | nd   | nd       |
| Marikana (Aquarius)                                 | 0                        | 0.00              | 0                 | 0                 | 0                | 0                | 0                 | 0               | 0                   | 0.0  | 0.0      |
| Platinum Mile RF                                    | 3400                     | 0.75              | 204               | 111               | 30               | 11               | 56 <sup>c</sup>   |                 | 413                 | nd   | nd       |
| Chromite TRF                                        | 0                        | 0.00              | 0                 | 0                 | 0                | 0                | 0                 | 0               | 0                   | 0.0  | 0.0      |
| Crocodile River                                     | 243                      | 3.91 <sup>a</sup> | 475               | 197               | 80               | 6                | nd                | nd              | 757 <sup>a</sup>    | nd   | nd       |
| Eland                                               | nd                       | nd                | 720               | 400 <sup>d</sup>  | 120 <sup>d</sup> | 1 <sup>d</sup>   | 497 <sup>d</sup>  |                 | 1737 <sup>d</sup>   | nd   | nd       |
| Pilanesberg                                         | 3737                     | 2.00              | 2588 <sup>b</sup> | nd                | nd               | nd               | nd                | nd              | 4230                | nd   | nd       |
| Tharisa                                             | 3866                     | nd                | 984 <sup>b</sup>  | 257 <sup>b</sup>  | 132 <sup>b</sup> | 2 <sup>b</sup>   | 190 <sup>b</sup>  | 62 <sup>b</sup> | 1627 <sup>b</sup>   | nd   | nd       |
| Sylvania Chromite TRF                               | 2013                     | nd                | nd                | nd                | nd               | nd               | nd                |                 | 1255                | nd   | nd       |
| <b>Northeastern Limb</b>                            |                          |                   |                   |                   |                  |                  |                   |                 |                     |      |          |
| Limpopo <sup>f</sup>                                | 0                        | 0.00              | 0                 | 0                 | 0                | 0                | 0                 | 0               | 0                   | 0.0  | 0.0      |
| Bokoni                                              | 1526                     | 3.56 <sup>a</sup> | nd                | nd                | nd               | nd               | nd                | nd              | 4848 <sup>a</sup>   | nd   | nd       |
| Marula                                              | 1794                     | 4.19              | 2033              | 2084              | 431              |                  | 791 <sup>c</sup>  |                 | 5338                | 0.2  | nd       |
| Twickenham                                          | 198                      | 4.02 <sup>a</sup> | 283               | 275               | 23               | 9                | 3 <sup>c</sup>    |                 | 593                 | nd   | nd       |
| Modikwa                                             | 2166                     | 4.48              | 3623              | 3351              | 713              | 94               | 1066 <sup>c</sup> |                 | 8845                | 0.6  | 0.3      |
| Smokey Hills                                        | 0                        | 0.00              | 0                 | 0                 | 0                | 0                | 0                 | 0               | 0                   | 0.0  | 0.0      |
| <b>Southeastern Limb &amp; Satellite Intrusions</b> |                          |                   |                   |                   |                  |                  |                   |                 |                     |      |          |
| Booysendal (Everest)                                | 0                        | 0.00              | 0                 | 0                 | 0                | 0                | 0                 | 0               | 0                   | 0.0  | 0.0      |
| Two rivers                                          | 3172                     | 4.02              | 4598              | 2795              | 814              |                  | 1726 <sup>c</sup> |                 | 9934                | 0.6  | nd       |
| Mototolo                                            | 2568                     | 3.30 <sup>a</sup> | 7286              | 4190              | 1179             | 119              | 2098 <sup>c</sup> |                 | 14872               | 0.8  | 0.4      |
| Blue Ridge                                          | 0                        | 0.00              | 0                 | 0                 | 0                | 0                | 0                 | 0               | 0                   | 0.0  | 0.0      |
| Nkomati                                             | 7558                     | nd                | nd                | nd                | nd               | nd               | nd                | nd              | 3152                | 23.2 | 9.9      |
| <b>Northern Limb</b>                                |                          |                   |                   |                   |                  |                  |                   |                 |                     |      |          |
| Mogalakwena                                         | 11031                    | 2.90 <sup>a</sup> | 9718              | 9854              | 618              | 1188             | nd                | nd              | 20834 <sup>a</sup>  | 11.4 | 7.2      |
| <b>Zimbabwe</b>                                     |                          |                   |                   |                   |                  |                  |                   |                 |                     |      |          |
| Zimplats                                            | 4683                     | 3.53              | 5616              | 4454              | 482              |                  | 1247 <sup>c</sup> |                 | 11799               | 3.9  | nd       |
| Mimosa                                              | 2381                     | 3.95              | 2843              | 2254              | 247              |                  | 746 <sup>c</sup>  |                 | 6089                | 3.2  | nd       |
| Unki                                                | 1570                     | 3.40 <sup>a</sup> | 1899              | 1296              | 150              | 201              | nd                | nd              | 3535                | 1.3  | 1.6      |

Italic values present calculated values or estimations. Abbreviations: nd – no data, TRF – Tailing Retreatment Facility. <sup>a</sup> Data represents 4E. <sup>b</sup> Estimate based on prill split. <sup>c</sup> Calculated by subtracting reported production quantities of single elements from total PGE production. <sup>d</sup> Values of individual mine and element were estimated by multiplying the share of the respective mine's total PGE production of the company's total PGE production by the company's production of the respective individual element. <sup>e</sup> Production quantities were estimated based two quarterly reports that reported production values. Therefore, sum of single elements and total 4E production might differ. <sup>f</sup> Production quantities of individual elements for each mine were obtained by multiplying the share of individual metal quantities delivered in concentrate for each mine and for the whole company by the company's total production for each element.

Note: The ownership of mines is presented in a separate Excel sheet that is provided in the Supplementary material 2.

Table S7. Mining Data 2014 [6–41].

| Mine                                                | Ore milled/<br>processed | Head<br>grade     | Pt                | Pd                | Rh               | Au               | Ru                | Ir                | Total<br>PGMs        | Ni               | Cu               |
|-----------------------------------------------------|--------------------------|-------------------|-------------------|-------------------|------------------|------------------|-------------------|-------------------|----------------------|------------------|------------------|
|                                                     | [1000 t]                 | [g/t]             |                   |                   |                  | [kg]             |                   |                   |                      |                  | [1000 t]         |
| <b>Western Limb</b>                                 |                          |                   |                   |                   |                  |                  |                   |                   |                      |                  |                  |
| Impala Rustenburg                                   | 6183                     | 4.34              | 11652             | 5596              | 1423             |                  | 3042 <sup>c</sup> |                   | 21713                | 2.0              | nd               |
| Marinkana (Lonmin)                                  | 5810                     | 4.39              | 11452             | 5543              | 202              | 343              | 2834              | 739               | 20771                | 2.2              | 1.4              |
| Pandora <sup>f</sup>                                | 281                      | nd                | 609               | 271               | 1                | 21               | 179               | 42                | 1102                 | 0.1              | 0.1              |
| Union <sup>f</sup>                                  | 2007                     | 3.13 <sup>a</sup> | 3036              | 1508              | 448              | 28               |                   | 573 <sup>c</sup>  | 5593                 | 0.4              | 0.1              |
| Tumela                                              | 2232                     | 3.92 <sup>a</sup> | 4238              | 2186              | 641              | 43               |                   | 907 <sup>c</sup>  | 8014                 | 0.8              | 0.3              |
| Dishaba                                             | 1239                     | 3.92 <sup>a</sup> | 2563              | 1262              | 286              | 60               |                   | 357 <sup>c</sup>  | 4527                 | 0.8              | 0.2              |
| Bathopele                                           | 1904                     | 2.85 <sup>a</sup> | 2693              | 1667              | 405              | 28               |                   | 601 <sup>c</sup>  | 5395                 | 0.6              | 0.1              |
| Thembelani + Khuseleka                              | 1549                     | 3.96 <sup>a</sup> | 3238              | 1817              | 369              | 85               |                   | 479 <sup>c</sup>  | 5987                 | 1.4              | 0.4              |
| Siphumelele + Khomani                               | 627                      | 4.18 <sup>a</sup> | 1497              | 726               | 102              | 68               |                   | 96 <sup>c</sup>   | 2489                 | 1.1              | 0.3              |
| Western Limb TRF                                    | 5151                     | 1.33 <sup>a</sup> | 1690              | 618               | 85               | 136              |                   | 147 <sup>c</sup>  | 2676                 | 0.9              | 0.9              |
| Kroondal                                            | 4830                     | 3.53 <sup>a</sup> | 13460             | 6838              | 2444             | 130              |                   | 4672 <sup>c</sup> | 27544                | 1.0              | 0.6              |
| Bafokeng                                            | 2112                     | 4.29 <sup>a</sup> | 4187 <sup>e</sup> | 1727 <sup>e</sup> | 366 <sup>c</sup> | 197 <sup>e</sup> | nd                | nd                | 6477 <sup>a, e</sup> | 1.5 <sup>e</sup> | 0.9 <sup>e</sup> |
| Zondereinde                                         | 1724                     | 5.00 <sup>a</sup> | 5234              | 2539              | 671              | 136              | nd                | nd                | 8581 <sup>a</sup>    | nd               | nd               |
| Marikana (Aquarius)                                 | 0                        | 0.00              | 0                 | 0                 | 0                | 0                | 0                 | 0                 | 0                    | 0.0              | 0.0              |
| Platinum Mile RF                                    | 2400                     | 0.61              | 93                | 48                | 13               | 4                |                   | 25 <sup>c</sup>   | 183                  | nd               | nd               |
| Chromite TRF                                        | 0                        | 0.00              | 0                 | 0                 | 0                | 0                | 0                 | 0                 | 0                    | 0.0              | 0.0              |
| Crocodile River                                     | 0                        | 0.00              | 0                 | 0                 | 0                | 0                | 0                 | 0                 | 0                    | 0.0              | 0.0              |
| Eland                                               | nd                       | nd                | 677 <sup>d</sup>  | 439 <sup>d</sup>  | 112 <sup>d</sup> | 1 <sup>d</sup>   | nd                | nd                | 1168 <sup>a, d</sup> | nd               | nd               |
| Pilanesberg                                         | 3364                     | 1.99              | 2679 <sup>b</sup> |                   |                  |                  |                   |                   | 4378                 |                  |                  |
| Tharisa                                             | 3913                     | nd                | 1341 <sup>b</sup> | 350 <sup>b</sup>  | 180 <sup>b</sup> | 2 <sup>b</sup>   | 259 <sup>b</sup>  | 84 <sup>b</sup>   | 2217                 | 0.0              | 0.0              |
| Sylvania Chromite TRF                               | 2510                     | nd                | nd                | nd                | nd               | nd               | nd                | nd                | 1525                 | nd               | nd               |
| <b>Northeastern Limb</b>                            |                          |                   |                   |                   |                  |                  |                   |                   |                      |                  |                  |
| Limpopo <sup>f</sup>                                | 27                       | nd                | 39                | 35                | 2                | 1                | 6                 | 2                 | 84                   | 0.0              | 0.0              |
| Bokoni                                              | 1743                     | 3.59 <sup>a</sup> | 5500              | nd                | nd               | nd               | nd                | nd                | 5501 <sup>a</sup>    | nd               | nd               |
| Marula                                              | 1794                     | 4.19              | 2179              | 2282              | 473              |                  |                   | 917 <sup>c</sup>  | 5851                 | 0.3              | 0.0              |
| Twickenham                                          | 240                      |                   | 309               | 298               | 68               | 11               |                   | 88 <sup>c</sup>   | 774                  | 0.1              | 0.0              |
| Modikwa                                             | 1972                     | 4.28              | 2758              | 2551              | 542              | 85               |                   | 805 <sup>c</sup>  | 6742                 | 0.6              | 0.5              |
| Smokey Hills                                        | 0                        | 0.00              | 0                 | 0                 | 0                | 0                | 0                 | 0                 | 0                    | 0.0              | 0.0              |
| <b>Southeastern Limb &amp; Satellite Intrusions</b> |                          |                   |                   |                   |                  |                  |                   |                   |                      |                  |                  |
| Booysendal (Everest)                                | 1517                     | 2.60 <sup>a</sup> | 1621              | 786               | 208              | 42               | nd                | nd                | 2658 <sup>a</sup>    | nd               | nd               |
| Two rivers                                          | 3279                     | 4.01              | 4964              | 2911              | 879              | 1868             | nd                | nd                | 10623                | 0.6              | 0.00             |
| Mototolo                                            | 2632                     | 3.17 <sup>a</sup> | 6781              | 4105              | 1117             | 125              |                   | 2047 <sup>c</sup> | 14175                | 1.0              | 0.4              |
| Blue Ridge                                          | 0                        | 0.00              | 0                 | 0                 | 0                | 0                | 0                 | 0                 | 0                    | 0.0              | 0.0              |
| Nkomati                                             | 7930                     | nd                | nd                | nd                | nd               | nd               | nd                | nd                | 5250                 | 22.9             | 10.1             |
| <b>Northern Limb</b>                                |                          |                   |                   |                   |                  |                  |                   |                   |                      |                  |                  |
| Mogalakwena                                         | 11731                    | 3.03 <sup>a</sup> | 10121             | 10719             | 646              | 1335             | nd                | nd                | 22254                | 15.4             | 10.7             |
| <b>Zimbabwe</b>                                     |                          |                   |                   |                   |                  |                  |                   |                   |                      |                  |                  |
| Zimplats                                            | 5939                     | 3.47              | 6795              | 5602              | 632              |                  | 1593 <sup>c</sup> |                   | 14623                | 4.8              | nd               |
| Mimosa                                              | 2453                     | 3.92              | 3124              | 2466              | 264              |                  | 797 <sup>c</sup>  |                   | 6651                 | 3.3              | nd               |
| Unki                                                | 1598                     | 3.10 <sup>a</sup> | 1709              | 1301              | 159              | 196              | nd                | nd                | 3382                 | 1.7              | 2.5              |

Note: The ownership of mines is presented in a separate Excel sheet that is provided in the Supplementary material 2.

Table S8. Processed ore type in 10<sup>6</sup> t.

| Ore type                 | 2010   | 2011   | 2012   | 2013   | 2014   | 2015   |
|--------------------------|--------|--------|--------|--------|--------|--------|
| Merensky                 | 17.990 | 17.547 | 14.024 | 14.218 | 8.548  | 20.578 |
| UG2                      | 54.829 | 62.200 | 55.217 | 55.532 | 45.254 | 69.159 |
| Platreef                 | 10.380 | 10.835 | 10.480 | 11.031 | 11.731 | 11.725 |
| MSZ                      | 6.372  | 7.818  | 8.252  | 8.634  | 9.990  | 9.406  |
| No information available | 16.193 | 8.336  | 14.523 | 13.984 | 15.169 | 7.371  |

Table S9. Ore grade in g 6E/t and g 4E/t.

| 6E                | 2010 | 2011 | 2012 | 2013 | 2014 | 2015 |
|-------------------|------|------|------|------|------|------|
| All mines         | 3.58 | 3.75 | 3.55 | 3.74 | 3.17 | 3.68 |
| Western Limb      | 3.55 | 3.70 | 3.46 | 3.69 | 2.79 | 3.63 |
| Northeastern Limb | 4.36 | 4.39 | 4.19 | 4.19 | 4.19 | 4.19 |
| Southeastern Limb | 3.52 | 3.88 | 3.86 | 4.02 | 4.01 | 3.98 |
| Northern Limb     | nd   | nd   | nd   | nd   | nd   | nd   |
| Great Dyke        | 3.67 | 3.68 | 3.67 | 3.67 | 3.60 | 3.62 |
| 4E                | 2010 | 2011 | 2012 | 2013 | 2014 | 2015 |
| All mines         | 3.42 | 3.43 | 3.38 | 3.41 | 3.22 | 3.53 |
| Western Limb      | 3.56 | 3.54 | 3.51 | 3.52 | 3.25 | 3.78 |
| Northeastern Limb | 4.44 | 4.39 | 4.40 | 4.10 | 3.96 | 3.91 |
| Southeastern Limb | 3.32 | 3.00 | 3.16 | 3.30 | 2.96 | 2.60 |
| Northern Limb     | 2.60 | 2.91 | 2.81 | 2.90 | 3.03 | 3.09 |
| Great Dyke        |      | 3.64 | 3.43 | 3.40 | 3.10 | 3.22 |

Figures:

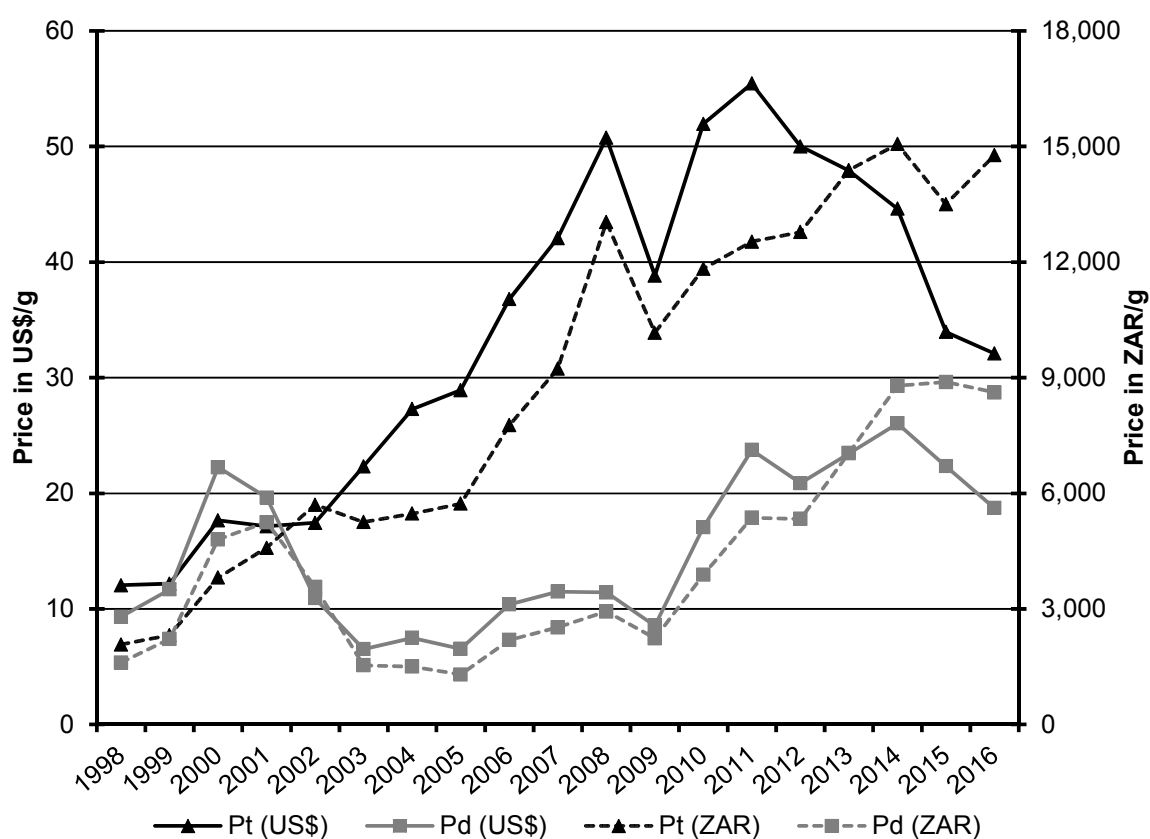

Figure S1. Pt and Pd price [43]. Prices for 2016 are average values from January to August.

## References

1. USGS National Minerals Information Center (Ed.). Mineralbooks 2000–2014. Platinum-Group Metals, 2014. Available online: <https://minerals.usgs.gov/minerals/pubs/commodity/platinum/> (accessed on 13 November 2016).
2. USGS National Minerals Information Center. (Ed.) Mineralbooks 1998–2016. Gold, 2016. Available online: <https://minerals.usgs.gov/minerals/pubs/commodity/gold/> (accessed on 13 November 2016).
3. USGS National Minerals Information Center (Ed.). Mineral Commodity Summaries—Nickel, 2017. Available online: <https://minerals.usgs.gov/minerals/pubs/commodity/nickel/mcs-2017-nicke.pdf> (accessed on 25 August 2017).
4. USGS National Minerals Information Center (Ed.). Mineral Commodity Summaries—Copper, 2017. Available online: <https://minerals.usgs.gov/minerals/pubs/commodity/copper/mcs-2017-coppe.pdf> (accessed on 25 August 2017).
5. Anglo American Platinum Ltd. (Ed.) *Ore Reserves and Mineral Resources 2015. Driving change, defining our future*; Anglo American Platinum Ltd.: Johannesburg, South Africa, 2015.
6. Aberdeen International Inc. (Ed.). *A Technical Report on the Smokey Hills Platinum Mine, Limpopo Province, South Africa*; Aberdeen International Inc.: Roodepoort, South Africa, 2016.
7. Aberdeen International Inc. (Ed.). African Thunder Platinum: A Platinum/Palladium Producer in South Africa. Available online: <http://www.aberdeeninternational.ca/Portfolio/Proven-Track-Record/Proven-Track-Record/2010/Avion/default.aspx> (accessed on 18 November 2016).
8. Anglo American Platinum Ltd. (Ed.). *Operations Review 2014*; Anglo American Platinum Ltd.: Johannesburg, South Africa, 2014.
9. Anglo American Platinum Ltd. (Ed.). *Fact Book 2015. Focus: Operating Smarter*; Anglo American Platinum Ltd.: Johannesburg, South Africa, 2015.
10. Anglo American Platinum Ltd. (Ed.). *Quarterly Production Report*; Anglo American Platinum Ltd.: Johannesburg, South Africa, 2016.
11. Aquarius Platinum Ltd. (Ed.). *Annual Reports 2010*; Aquarius Platinum Ltd.: Johannesburg, South Africa, 2010.
12. Eastern Platinum Ltd. (Ed.). *Sustainable Development Report 2010*; Eastern Platinum Ltd.: Bryanston, South Africa, 2010.
13. Eastern Platinum Ltd. (Ed.). *Quarterly reports 2011–2012*; Eastern Platinum Ltd.: Bryanston, South Africa, 2011–2012.
14. Impala Platinum Holdings Ltd. (Ed.). *Integrated Annual Report 2014*; Impala Platinum Holdings Ltd.: Illovo, South Africa, 2014.
15. Impala Platinum Holdings Ltd. (Ed.). *Annual Integrated Report 2016*; Impala Platinum Holdings Ltd.: Illovo, South Africa, 2016.
16. Lonmin Plc. (Ed.) *Annual Report and Accounts. Building for Future*; Lonmin Plc.: London, UK, 2011.
17. Lonmin Plc. (Ed.) Operating Statistics: Five Year Review. Available online: [http://www.lonmin.com/reports/2015/online\\_annual\\_report\\_2015/a\\_deeper\\_look/operating\\_statistics\\_five\\_year\\_review\\_01.html](http://www.lonmin.com/reports/2015/online_annual_report_2015/a_deeper_look/operating_statistics_five_year_review_01.html) (accessed on 18 November 2016).
18. Mudd, G.M. Key trends in the resource sustainability of platinum group elements. *Ore Geol. Rev.* **2012**, *46*, 106–117, doi:10.1016/j.oregeorev.2012.02.005.
19. Northam Platinum Ltd. (Ed.) *Annual Integrated Report 2014*; Northam Platinum Ltd.: Johannesburg, South Africa, 2014.
20. Northam Platinum Ltd. (Ed.) *Annual Integrated Report 2016*; Northam Platinum Ltd.: Johannesburg, South Africa, 2016.
21. Platmin Ltd. (Ed.) *Annual Report for the Year Ended December 31, 2010*; Platmin Ltd.: Centurion, South Africa, 2011.
22. Royal Bafokeng Holdings Ltd. (Ed.) *Quarterly Review and Production Report for the Period 1 January 2012 to 30 September 2015*; Royal Bafokeng Holdings Ltd.: Johannesburg, South Africa, 2012–2015.
23. Royal Bafokeng Holdings Ltd. *Integrated Report 2015*; Royal Bafokeng Holdings Ltd.: Johannesburg, South Africa, 2015.
24. Sedibelo Platinum Mines Ltd. (Ed.) Management's Discussion and Analysis of Financial Condition and Results of Operations for the Three and Twelve Months Ended December 31, 2012, 2013. Available online:

- <http://www.sedibelo platinum.com/reporting-and-investors/quarterly-md-and-a-reports/2015> (accessed on 18 November 2016).
25. Sedibelo Platinum Mines Ltd. (Ed.) *Consolidated and Separate Financial Statements for the Year Ended December 31, 2013*; Sedibelo Platinum Mines Ltd.: Highveld, South Africa, 2014.
  26. Sedibelo Platinum Mines Ltd. (Ed.) *Management's Discussion and Analysis of Financial Condition and Results of Operations for the Three and Twelve Months Ended December 31, 2013*; Sedibelo Platinum Mines Ltd.: Highveld, South Africa, 2014. Available online: <http://www.sedibelo platinum.com/reporting-and-investors/quarterly-md-and-a-reports/2015> (accessed on 18 November 2016).
  27. Sedibelo Platinum Mines Ltd. (Ed.) *Management's Discussion and Analysis of Financial Condition and Results of Operations for the Three and Twelve Months Ended December 31, 2015*; Sedibelo Platinum Mines Ltd.: Highveld, South Africa, 2016. Available online: <http://www.sedibelo platinum.com/reporting-and-investors/quarterly-md-and-a-reports/2015> (accessed on 18 November 2016).
  28. Sylvania Resources Ltd. (Ed.) *Annual Report 2011*; Sylvania resources Ltd.: Hamilton, Bermuda, 2011.
  29. Sylvania Resources Ltd. (Ed.) *Annual Report 2013*; Sylvania resources Ltd.: Hamilton, Bermuda, 2013.
  30. Sylvania Resources Ltd. (Ed.) *Annual Report 2015*; Sylvania resources Ltd.: Hamilton, Bermuda, 2015.
  31. Tharisa Plc. (Ed.) *Annual Report 2014*; Tharisa Plc.: Paphos, Cyprus, 2015.
  32. Tharisa Plc. (Ed.) *Annual Report 2015*; Tharisa Plc.: Paphos, Cyprus, 2016.
  33. Xstrata Plc. (Ed.) *Mineral Resources & Ore Reserves 2011*; Xstrata Plc.: Zug, Switzerland, 2011.
  34. Xstrata Plc. (Ed.) *Mineral Resources & Ore Reserves 2012*; Xstrata Plc.: Zug, Switzerland, 2012.
  35. African Rainbow Minerals Ltd. (Ed.) *Integrated Annual Report 2015*; African Rainbow Minerals Ltd.: Sandton, South Africa, 2015.
  36. African Rainbow Minerals Ltd. (Ed.) *Integrated Annual Report 2010*; African Rainbow Minerals Ltd.: Sandton, South Africa, 2010.
  37. African Rainbow Minerals Ltd. (Ed.) *Integrated Annual Report 2011*; African Rainbow Minerals Ltd.: Sandton, South Africa, 2011.
  38. African Rainbow Minerals Ltd. (Ed.) *Integrated Annual Report 2012*; African Rainbow Minerals Ltd.: Sandton, South Africa, 2012.
  39. African Rainbow Minerals Ltd. (Ed.) *Integrated Annual Report 2013*; African Rainbow Minerals Ltd.: Sandton, South Africa, 2013.
  40. African Rainbow Minerals Ltd. (Ed.) *Integrated Annual Report 2014*; African Rainbow Minerals Ltd.: Sandton, South Africa, 2014.
  41. Glencore Plc. (Ed.) *Production Report for the 12 Months Ended 31 December 2015, 2016*. Available online: [http://www.glencore.com/assets/investors/doc/reports\\_and\\_results/2015/GLEN-2015-Q4-Production-Report.pdf](http://www.glencore.com/assets/investors/doc/reports_and_results/2015/GLEN-2015-Q4-Production-Report.pdf) (accessed on 20 November 2016).
  42. Xstrata Plc. (Ed.) *Mineral Resources & Ore Reserves 2011*; Xstrata Plc.: Zug, Switzerland, 2011.
  43. USGS National Minerals Information Center. *Mineralbooks 2000-2014*. Platinum-Group Metals, 2014. Available online: <https://minerals.usgs.gov/minerals/pubs/commodity/platinum/> (accessed on 13 November 2016).

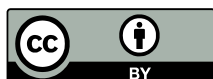

Supplement: s1 [file s1]
